# Supplementary material
Source: publisher site journal article supplement (https://www.dovepress.com/article/435771)
Supplement: Supplementary file 1 [file get_supplementary_file.php]

*Supplementary material*

**Table S1.** Forty-three *Citrobacter* genomes carrying carbapenemase-encoding genes were identified and selected for subsequent analysis.

| Assembly | Carbapenemase types | Country |
| --- | --- | --- |
| GCA_002863965.1 | KPC-2 | USA |
| GCA_003184045.1 | KPC-2 | China |
| GCA_003226155.1 | OXA-48 | Spain |
| GCA_004181905.1 | OXA-48 | France |
| GCA_004181995.1 | OXA-48 | France |
| GCA_014855915.1 | KPC-2 | Germany |
| GCA_014856055.1 | KPC-2 | Germany |
| GCA_015899105.1 | IMP-4 | Australia |
| GCA_015903445.1 | KPC-2 | USA |
| GCA_015929565.1 | OXA-48 | Spain |
| GCA_015929645.1 | OXA-48 | Spain |
| GCA_015934205.1 | NDM-1 | USA |
| GCA_016074985.1 | NDM-1 | Singapore |
| GCA_016445565.1 | NDM-1 | Singapore |
| GCA_016760555.1 | KPC-2 | USA |
| GCA_018353625.1 | KPC-3 | USA |
| GCA_018353645.1 | KPC-3 | USA |
| GCA_018358505.1 | NDM-1 | USA |
| GCA_018358525.1 | KPC-3 | USA |
| GCA_018358785.1 | KPC-3 | USA |
| GCA_018421745.1 | KPC-2 | Germany |
| GCA_018422455.2 | KPC-2 | Germany |
| GCA_018478165.1 | KPC-2 | USA |
| GCA_018976405.1 | NDM-1 | USA |
| GCA_020680805.3 | KPC-2 | USA |
| GCA_022120115.1 | OXA-48 | UK |
| GCA_022473935.1 | KPC-3 | USA |
| GCA_023037235.1 | OXA-48 | Singapore |
| GCA_023038655.1 | NDM-1 | Singapore |
| GCA_023039435.1 | NDM-1 | Singapore |
| GCA_023042655.1 | KPC-2 | Singapore |
| GCA_023156325.3 | KPC-34 | China |
| GCA_023364775.1 | NDM-1 | Singapore |
| GCA_023365735.1 | NDM-1 | Singapore |
| GCA_023564625.1 | NDM-1 | USA |
| GCA_023687185.1 | IMP-4 | Australia |
| GCA_024161065.1 | KPC-3 | USA |
| GCA_024257145.1 | KPC-2 | USA |
| GCA_025979225.1 | NDM-1 | Australia |
| GCA_026888335.1 | NDM-5 | USA |
| GCA_902387665.1 | KPC-2 | China |
| GCA_905337805.2 | OXA-48 | Spain |
| GCA_905337845.2 | OXA-48 | Spain |
| L2395 | NDM-1 | China |
